# Supplementary material for: Identification of Endometrial Cancer-Specific microRNA Biomarkers in Endometrial Fluid
Source: MDPI journal article supplement (doi:10.3390/ijms24108683), 2023-05-12
Supplement: s1 [file s1]

## Product Specification Sheet

# miScript™ miRNA PCR Array: CMIHS02413

## Custom miScript™ miRNA PCR Array

### Array Layout

|          | 1               | 2               | 3               | 4               | 5               | 6               | 7               | 8               | 9               | 10              | 11              | 12              |
|----------|-----------------|-----------------|-----------------|-----------------|-----------------|-----------------|-----------------|-----------------|-----------------|-----------------|-----------------|-----------------|
| <b>A</b> | hsa-miR-200c-3p | hsa-miR-210-3p  | hsa-miR-203a-3p | hsa-miR-218-5p  | hsa-miR-183-5p  | hsa-miR-185-3p  | hsa-miR-185-5p  | hsa-miR-429     | hsa-miR-146a-5p | hsa-miR-17-5p   | hsa-miR-18a-3p  | hsa-miR-21-5p   |
| <b>B</b> | hsa-let-7c-5p   | hsa-miR-7-5p    | hsa-miR-200a-3p | hsa-miR-200b-3p | hsa-miR-205-5p  | hsa-miR-181a-5p | hsa-miR-182-5p  | hsa-miR-135a-5p | hsa-miR-449a    | hsa-miR-423-5p  | hsa-miR-103a-3p | hsa-miR-107     |
| <b>C</b> | hsa-miR-34b-3p  | hsa-miR-9-5p    | hsa-miR-27a-5p  | hsa-miR-17-5p   | hsa-miR-126-3p  | hsa-miR-126-5p  | hsa-miR-199b-5p | hsa-miR-203a-3p | hsa-miR-204-5p  | hsa-miR-221-3p  | hsa-miR-221-5p  | hsa-let-7a-5p   |
| <b>D</b> | hsa-let-7e-5p   | hsa-miR-15b-5p  | hsa-miR-20a-5p  | hsa-miR-30c-5p  | hsa-miR-34b-3p  | hsa-miR-99b-5p  | hsa-miR-106b-5p | hsa-miR-152-3p  | hsa-miR-192-5p  | hsa-miR-193a-3p | hsa-miR-222-3p  | hsa-miR-410-3p  |
| <b>E</b> | hsa-miR-424-5p  | hsa-miR-1247-3p | hsa-miR-370-3p  | hsa-miR-376c-3p | hsa-miR-542-5p  | hsa-miR-377-3p  | hsa-miR-362-3p  | hsa-miR-223-3p  | hsa-miR-10a-5p  | hsa-miR-32-5p   | hsa-miR-124-3p  | hsa-miR-125b-5p |
| <b>F</b> | hsa-miR-19b-3p  | hsa-miR-4705    | hsa-miR-34a-5p  | hsa-miR-155-5p  | hsa-miR-16-5p   | hsa-miR-124-3p  | hsa-miR-296-5p  | hsa-miR-199a-5p | hsa-miR-335-5p  | hsa-miR-188-5p  | hsa-miR-378c    | hsa-miR-1228-3p |
| <b>G</b> | hsa-miR-3200-5p | hsa-miR-3613-3p | hsa-miR-1-3p    | hsa-miR-196a-5p | hsa-miR-1207-3p | hsa-miR-1321    | hsa-miR-128-3p  | hsa-miR-3918    | hsa-miR-4685-5p | hsa-miR-149-5p  | hsa-miR-7110-3p | hsa-miR-149-3p  |
| <b>H</b> | miRTC           | PPC             | miRTC           | PPC             | miRTC           | PPC             | SNORD61         | SNORD68         | SNORD61         | SNORD68         | cel-miR-39-3p   | cel-miR-39-3p   |

### Gene Table

| Position | MatureSangerID  | MatureSangerAccession | Catalog Number |
|----------|-----------------|-----------------------|----------------|
| A01      | hsa-miR-200c-3p | MIMAT0000617          | MS00003752     |
| A02      | hsa-miR-210-3p  | MIMAT0000267          | MS00003801     |
| A03      | hsa-miR-203a-3p | MIMAT0000264          | MS00003766     |
| A04      | hsa-miR-218-5p  | MIMAT0000275          | MS00006769     |
| A05      | hsa-miR-183-5p  | MIMAT0000261          | MS000031507    |
| A06      | hsa-miR-185-3p  | MIMAT00004611         | MS00008876     |
| A07      | hsa-miR-185-5p  | MIMAT0000455          | MS00003647     |
| A08      | hsa-miR-429     | MIMAT0001536          | MS00004193     |
| A09      | hsa-miR-146a-5p | MIMAT0000449          | MS00003535     |
| A10      | hsa-miR-17-5p   | MIMAT0000070          | MS00029274     |
| A11      | hsa-miR-18a-3p  | MIMAT0002891          | MS00006538     |
| A12      | hsa-miR-21-5p   | MIMAT0000076          | MS00009079     |
| B01      | hsa-let-7c-5p   | MIMAT0000064          | MS00003129     |
| B02      | hsa-miR-7-5p    | MIMAT0000252          | MS00032116     |
| B03      | hsa-miR-200a-3p | MIMAT0000682          | MS00003738     |
| B04      | hsa-miR-200b-3p | MIMAT0000318          | MS00009016     |
| B05      | hsa-miR-205-5p  | MIMAT0000266          | MS00003780     |
| B06      | hsa-miR-181a-5p | MIMAT0000256          | MS00008827     |
| B07      | hsa-miR-182-5p  | MIMAT0000259          | MS00008855     |
| B08      | hsa-miR-135a-5p | MIMAT0000428          | MS00008624     |
| B09      | hsa-miR-449a    | MIMAT0001541          | MS00004228     |
| B10      | hsa-miR-423-5p  | MIMAT0004748          | MS00009681     |
| B11      | hsa-miR-103a-3p | MIMAT0000101          | MS00031241     |
| B12      | hsa-miR-107     | MIMAT0000104          | MS00031255     |
| C01      | hsa-miR-34b-3p  | MIMAT0004676          | MS00008190     |
| C02      | hsa-miR-9-5p    | MIMAT0000441          | MS00010752     |
| C03      | hsa-miR-27a-5p  | MIMAT0004501          | MS00009240     |
| C04      | hsa-miR-17-5p   | MIMAT0000070          | MS00029274     |
| C05      | hsa-miR-126-3p  | MIMAT0000445          | MS00003430     |
| C06      | hsa-miR-126-5p  | MIMAT0000444          | MS00006636     |
| C07      | hsa-miR-199b-5p | MIMAT0000263          | MS00003731     |
| C08      | hsa-miR-203a-3p | MIMAT0000264          | MS00003766     |
| C09      | hsa-miR-204-5p  | MIMAT0000265          | MS00003773     |
| C10      | hsa-miR-221-3p  | MIMAT0000278          | MS00003857     |

| Position | MatureSangerID  | MatureSangerAccession | Catalog Number |
|----------|-----------------|-----------------------|----------------|
| C11      | hsa-miR-221-5p  | MIMAT0004568          | MS00009170     |
| C12      | hsa-let-7a-5p   | MIMAT0000062          | MS00031220     |
| D01      | hsa-let-7e-5p   | MIMAT0000066          | MS00031227     |
| D02      | hsa-miR-15b-5p  | MIMAT0000417          | MS00008792     |
| D03      | hsa-miR-20a-5p  | MIMAT0000075          | MS00003199     |
| D04      | hsa-miR-30c-5p  | MIMAT0000244          | MS00009366     |
| D05      | hsa-miR-34b-3p  | MIMAT0004676          | MS00008190     |
| D06      | hsa-miR-99b-5p  | MIMAT0000689          | MS00032165     |
| D07      | hsa-miR-106b-5p | MIMAT0000680          | MS00003402     |
| D08      | hsa-miR-152-3p  | MIMAT0000438          | MS00003591     |
| D09      | hsa-miR-192-5p  | MIMAT0000222          | MS00003689     |
| D10      | hsa-miR-193a-3p | MIMAT0000459          | MS00031542     |
| D11      | hsa-miR-222-3p  | MIMAT0000279          | MS00007609     |
| D12      | hsa-miR-410-3p  | MIMAT0002171          | MS00004144     |
| E01      | hsa-miR-424-5p  | MIMAT0001341          | MS00004186     |
| E02      | hsa-miR-1247-3p | MIMAT0022721          | MS00042357     |
| E03      | hsa-miR-370-3p  | MIMAT0000722          | MS00004053     |
| E04      | hsa-miR-376c-3p | MIMAT0000720          | MS00004046     |
| E05      | hsa-miR-542-5p  | MIMAT0003340          | MS00007147     |
| E06      | hsa-miR-377-3p  | MIMAT0000730          | MS00004095     |
| E07      | hsa-miR-362-3p  | MIMAT0004683          | MS00009562     |
| E08      | hsa-miR-223-3p  | MIMAT0000280          | MS00003871     |
| E09      | hsa-miR-10a-5p  | MIMAT0000253          | MS00031262     |
| E10      | hsa-miR-32-5p   | MIMAT0000090          | MS00003297     |
| E11      | hsa-miR-124-3p  | MIMAT0000422          | MS00006622     |
| E12      | hsa-miR-125b-5p | MIMAT0000423          | MS00006629     |
| F01      | hsa-miR-19b-3p  | MIMAT0000074          | MS00031584     |
| F02      | hsa-miR-4705    | MIMAT0019805          | MS00039928     |
| F03      | hsa-miR-34a-5p  | MIMAT0000255          | MS00003318     |
| F04      | hsa-miR-155-5p  | MIMAT0000646          | MS00031486     |
| F05      | hsa-miR-16-5p   | MIMAT0000069          | MS00031493     |
| F06      | hsa-miR-124-3p  | MIMAT0000422          | MS00006622     |
| F07      | hsa-miR-296-5p  | MIMAT0000690          | MS00016401     |
| F08      | hsa-miR-199a-5p | MIMAT0000231          | MS00006741     |
| F09      | hsa-miR-335-5p  | MIMAT0000765          | MS00003976     |
| F10      | hsa-miR-188-5p  | MIMAT0000457          | MS00003668     |
| F11      | hsa-miR-378c    | MIMAT0016847          | MS00021119     |
| F12      | hsa-miR-1228-3p | MIMAT0005583          | MS00042385     |
| G01      | hsa-miR-3200-5p | MIMAT0017392          | MS00022925     |
| G02      | hsa-miR-3613-3p | MIMAT0017991          | MS00031787     |
| G03      | hsa-miR-1-3p    | MIMAT0000416          | MS00008358     |
| G04      | hsa-miR-196a-5p | MIMAT0000226          | MS00031563     |
| G05      | hsa-miR-1207-3p | MIMAT0005872          | MS00014182     |
| G06      | hsa-miR-1321    | MIMAT0005952          | MS00014644     |
| G07      | hsa-miR-128-3p  | MIMAT0000424          | MS00008582     |
| G08      | hsa-miR-3918    | MIMAT0018192          | MS00023576     |
| G09      | hsa-miR-4685-5p | MIMAT0019771          | MS00040117     |
| G10      | hsa-miR-149-5p  | MIMAT0000450          | MS00003570     |
| G11      | hsa-miR-7110-3p | MIMAT0028118          | MS00048265     |
| G12      | hsa-miR-149-3p  | MIMAT0004609          | MS00037702     |
| H01      | miRTC           | SA_miRNA_005          | MS00000001     |
| H02      | PPC             | SA_00104              | MS00000002     |
| H03      | miRTC           | SA_miRNA_005          | MS00000001     |
| H04      | PPC             | SA_00104              | MS00000002     |
| H05      | miRTC           | SA_miRNA_005          | MS00000001     |
| H06      | PPC             | SA_00104              | MS00000002     |
| H07      | SNORD61         | NR_002735             | MS00033705     |
| H08      | SNORD68         | NR_002450             | MS00033712     |
| H09      | SNORD61         | NR_002735             | MS00033705     |
| H10      | SNORD68         | NR_002450             | MS00033712     |
| H11      | cel-miR-39-3p   | MIMAT0000010          | MS00019789     |
| H12      | cel-miR-39-3p   | MIMAT0000010          | MS00019789     |
