# Supplementary material for: Identification of Endometrial Cancer-Specific microRNA Biomarkers in Endometrial Fluid
Source: MDPI journal article supplement (doi:10.3390/ijms24108683), 2023-05-12
Supplement: s1 [file s1]

## Supplementary S2 – Data Analysis

Data obtained from miScript miRNA PCR Array was uploaded and analyzed using QIAGEN Data Analysis Protocol on their web resources: The GeneGlobe Data Analysis Center. The miScript miRNA PCR Data Analysis spreadsheet can be found under “Product Resources/Performance Data” at [www.qiagen.com/us/shop/pcr/primer-sets/miscript-mirna-pcr-arrays/#resources](http://www.qiagen.com/us/shop/pcr/primer-sets/miscript-mirna-pcr-arrays/#resources), once the user was registered.
