# Supplementary material for: Identification of Endometrial Cancer-Specific microRNA Biomarkers in Endometrial Fluid
Source: Int J Mol Sci. 2023 May 12;24(10):8683. doi: 10.3390/ijms24108683 (PMC10218319; doi:10.3390/ijms24108683)
Supplement: Supplementary file 1 [file ijms-24-08683-s001.zip]

Archive with 6 entries (6 files):
- Supplementary S1_Method.pdf
- Supplementary S2_Data Analysis.pdf
- Table S1- Quant Summary_All Samples.xlsx
- Table S2_Forld-change Analysis_Phase I.xlsx
- Table S3_14 EC-Specific miRNA_Their Targets and Pathways.xlsx
- Table S4_Custom CMIHS02413_Actual Final Plate Gene Layout.pdf
