# Supplementary material for: Identification of Endometrial Cancer-Specific microRNA Biomarkers in Endometrial Fluid
Source: Int J Mol Sci. 2023 May 12;24(10):8683. doi: 10.3390/ijms24108683 (PMC10218319; doi:10.3390/ijms24108683)
Supplement: Supplementary file 1 [file ijms-24-08683-s001.zip › Table S1- Quant Summary_All Samples.xlsx]

## Sheet: Sum - Quant
	Table S1: Summary - Quantification of RNA Samples Extracted from Endometrial Fluids - Using Epoch (BioTek)
	Phase I - Screen of 84 Selected miRNA Genes with 60 Endometrial Fluid Samples				Phase II - Validation of 14 Selected miRNA Genes with 22 Endometrial Fluid Samples
	SIS Sample ID#	Quant (ng/uL)	Notes		Sample ID#	Quant [ng/µL]	Note
	C-001	196.3			C-064	14.85
	C-002	85.3			C-065	6.67	Pinkish
	C-004	472.8			C-066	10.01
	C-005	97.6	SIS fluid - bloody		C-067	10.05
	C-006	19			C-068	18.58
	C-007	37.3			C-069	37.06	Bloody
	C-008	811.4	SIS fluid - bloody		C-070	308.78	Bloody
	C-009	30.7			C-071	7.33
	C-010	20.2			C-072	113.05	Pinkish
	C-011	20	SIS fluid - pinkish		C-073	21.74	Yellowish
	C-012	13.7			C-074	53.6
	C-013	42.6			C-075	11.013
	C-014	26.3			C-076	137.085	Pink
	C-015	80.9			C-077	2.792	Yellow
	C-016	48.4			C-078	21.191
	C-017	29.2			C-079	12.822	Pinkish
	C-018	118.4	SIS fluid - pinkish		C-080	7.171
	C-019	29.4			C-081	5.147
	C-020	21.5			C-082	9.89	Pinkish
	C-021	452.5	SIS fluid - bloody		C-083	30.8	Yellowish
	C-022	19	SIS fluid - pinkish		C-084	173.5	Clear
	C-023	374			C-085	17.6	Clear
	C-024	26.2
	C-025	17.3	SIS fluid - pink ring		Total SIS Sample	Average Quant (ng/mL)	STDV
	C-026	41.8	SIS fluid - bloody		22	46.8514	74.479
	C-027	20.9
	C-028	102
	C-029	4.4
	C-030	42.2
	C-031	35
	C-032	4.3	Yellowish
	C-033	89
	C-034	149
	C-035	50.9	Pinkish
	C-036	23.7
	C-037	21.7
	C-038	27.8	Pinkish
	C_039	38	Pinkish
	C_040	21.9
	C_041	34.1
	C_042	27.9
	C_043	21	Yellowish
	C_044	16.9	Pinkish
	C_045	22.8	Bright Yellow
	C_046	30.8
	C_047	81.5
	C_048	53
	C_049	26
	C_051	149.8	Bloody
	C_052	52.7	Redish Yellow
	C_053	115.5
	C_054	30.9	Yellowish
	C_056	43.4	Yellowish
	C_057	57.6	Yellowish
	C_058	57.2	Yellowish
	C_059	69.6	Bloody
	C_060	45.4
	C_061	35.2	Tiny Pinkish
	C_062	25.2
	C_063	18.4
	Total SIS Sample	Average Quant (ng/mL)	STDV
	60	79.625	133.882
