# Supplementary material for: Identification of Endometrial Cancer-Specific microRNA Biomarkers in Endometrial Fluid
Source: Int J Mol Sci. 2023 May 12;24(10):8683. doi: 10.3390/ijms24108683 (PMC10218319; doi:10.3390/ijms24108683)
Supplement: Supplementary file 1 [file ijms-24-08683-s001.zip › Table S2_Forld-change Analysis_Phase I.xlsx]

## Sheet: validation_exploration
Gene Symbol	Exploration	C_064	C_067	C_068	C_070	C_071	C_072	C_074	C_075	C_079	C_080	C_081	C_084	geomean
hsa-miR-183-5p	4.57	7.65	2.01	0.63	3.43	1.89	2.68	3.49	9.71	1.11	37.27	2.12	17.42	3.78748
hsa-miR-182-5p	4.48	13.05	0.4	1.1	0.72	0.58	6.19	1.74	0.51	0.53	316.42	2.73	74.97	2.95984
hsa-miR-429	4.3	4.82	5.01	1.59	2.8	1.74	5.1	6.55	10.13	1.45	29.22	2.26	14.39	4.58901
hsa-miR-7-5p	3.3	1.07	0.58	0.23	0.25	0.8	0.99	0.6	1.08	0.52	11.41	1.14	1.7	0.878251
hsa-miR-34a-5p	2.77	0.7	0.86	4.25	0.76	1.28	3.38	1.48	0.28	0.52	69.75	2.94	11.25	2.00347
hsa-miR-19b-3p	2.6	0.51	1.23	0.44	1.94	1.33	1.57	2	0.62	0.72	14.7	1.67	5.7	1.50925
hsa-miR-335-5p	2.44	1.33	1.63	2.64	0.68	1.55	1.76	1.4	1.18	1.05	7.32	2.53	2.08	1.72812
hsa-miR-146a-5p	2.37	7.08	3.5	1.96	4.83	1.58	1.26	1.5	3.05	1.31	2.08	0.87	2.44	2.19279
hsa-miR-181a-5p	2.3	0.26	0.44	0.3	0.75	0.37	5.65	1.09	0.73	0.18	20.72	3.26	6.17	1.10213
hsa-miR-21-5p	2.26	1.97	0.81	2.25	0.52	0.75	0.64	0.5	1.61	1.39	0.07	0.6	0.18	0.665747
hsa-miR-296-5p	0.49	1.16	0.79	0.62	0.64	0.96	0.14	0.53	0.88	0.22	1365.77	4.55	146.83	2.01854
hsa-miR-378c	0.49	2.63	1.8	1.4	1.02	2.2	0.22	1.2	2	0.49	943.51	10.36	189.94	3.7253
hsa-miR-34b-3p	0.43	4.46	2.81	3.16	0.43	1.5	0.33	4.19	0.67	0.13	169.85	3.14	66.06	2.62773
hsa-miR-204-5p	0.24	0.39	1.11	0.36	3.36	0.52	0.04	1.19	0.3	0.19	87	2.73	12	1.06402
	2^(-ΔCtCancer) / 2(^-ΔCtControl)
	Exploration	Validation
**183-5p	4.57	3.78748
182-5p	4.48	2.95984
***429	4.3	4.58901
7-5p	3.3	0.878251
34a-5p	2.77	2.00347
19b-3p	2.6	1.50925
335-5p	2.44	1.72812
**146a-5p	2.37	2.19279
181a-5p	2.3	1.10213
21-5p	2.26	0.665747
296-5p	0.49	2.01854
378c	0.49	3.7253
34b-3p	0.43	2.62773
204-5p	0.24	1.06402

## Sheet: exploration phase
Table S2_Phase I miRNA fold Change Analysis with p-Values
Position		AVG ΔCt		2^-ΔCt		Fold Change				Magnitude of regulation (irrespective of up or downregulation)
	Gene Symbol	Cancer	Control Group	Cancer	Control Group	Cancer/Control	Comments>	P Value	Cancer/Control	Cancer/Control	Rank
A1	hsa-miR-205-5p	2.3	4.84	0.203233	0.035014	5.8	A	0.366632	5.8	5.8	1
A2	hsa-miR-183-5p	4.04	6.23	0.060758	0.013305	4.57	A	0.000034	4.57	4.57	2
A3	hsa-miR-182-5p	3.75	5.91	0.074336	0.016605	4.48	A	0.000153	4.48	4.48	3
A4	hsa-miR-429	2.23	4.33	0.213436	0.049689	4.3		0.000439	4.3	4.3	4
A5	hsa-miR-204-5p	6.93	4.86	0.008187	0.034357	0.24		0.001237	-4.2	4.2	5
A6	hsa-miR-9-5p	4.55	6.41	0.042596	0.011796	3.61	A	0.052034	3.61	3.61	6
A7	hsa-miR-223-3p	-3.02	-1.2	8.13726	2.29964	3.54		0.209115	3.54	3.54	7
A8	hsa-miR-7-5p	3.38	5.11	0.095736	0.029018	3.3	A	0.007916	3.3	3.3	8
A9	hsa-miR-200a-3p	2.92	4.47	0.132422	0.045011	2.94		0.002281	2.94	2.94	9
A10	hsa-miR-34a-5p	2.68	4.15	0.15574	0.056253	2.77		0.002077	2.77	2.77	10
A11	hsa-miR-210-3p	5.06	6.52	0.02994	0.010872	2.75	A	0.123447	2.75	2.75	11
A12	hsa-miR-19b-3p	2.06	3.44	0.239629	0.092317	2.6		0.033666	2.6	2.6	12
B1	hsa-miR-200b-3p	-2.1	-0.73	4.28178	1.66371	2.57		0.000036	2.57	2.57	13
B2	hsa-miR-449a	4.32	5.65	0.050178	0.019907	2.52	A	0.159018	2.52	2.52	14
B3	hsa-miR-103a-3p	2.64	3.96	0.160971	0.064171	2.51		0.032113	2.51	2.51	15
B4	hsa-miR-335-5p	4.34	5.62	0.049499	0.020316	2.44	A	0.015308	2.44	2.44	16
B5	hsa-miR-146a-5p	2.58	3.83	0.167034	0.070548	2.37		0.002665	2.37	2.37	17
B6	hsa-miR-17-5p,hsa-miR-106a-5p	1.77	3	0.293455	0.125151	2.34		0.009644	2.34	2.34	18
B7	hsa-miR-1247-3p	10.48	9.25	0.000702	0.001641	0.43		0.020032	-2.34	2.34	18
B8	hsa-miR-34b-3p	7.49	6.27	0.005579	0.012992	0.43		0.026372	-2.33	2.33	20
B9	hsa-miR-199b-5p	3.31	2.09	0.101031	0.235219	0.43		0.178228	-2.33	2.33	20
B10	hsa-miR-106b-5p	1.68	2.89	0.31184	0.134724	2.31		0.017554	2.31	2.31	22
B11	hsa-miR-181a-5p	3.68	4.89	0.077942	0.033837	2.3	A	0.041993	2.3	2.3	23
B12	hsa-miR-3200-5p	2.44	3.63	0.18431	0.080627	2.29		0.062917	2.29	2.29	24
C1	hsa-miR-17-5p,hsa-miR-106a-5p	1.71	2.9	0.305775	0.134195	2.28		0.010110	2.28	2.28	25
C2	hsa-miR-21-5p	-5.06	-3.89	33.4332	14.7783	2.26		0.007181	2.26	2.26	26
C3	hsa-miR-34b-3p	7.51	6.34	0.0055	0.012354	0.45		0.031909	-2.25	2.25	27
C4	hsa-miR-20a-5p	0.54	1.7	0.687871	0.307092	2.24		0.014705	2.24	2.24	28
C5	hsa-miR-185-5p	3.87	5.02	0.068182	0.030878	2.21	A	0.275366	2.21	2.21	29
C6	hsa-miR-542-5p	7.28	6.17	0.006422	0.013882	0.46	B	0.102034	-2.16	2.16	30
C7	hsa-miR-376c-3p	6.96	5.91	0.008031	0.016678	0.48	B	0.237971	-2.08	2.08	31
C8	hsa-miR-378c	10.75	9.72	0.000579	0.001189	0.49		0.042479	-2.05	2.05	32
C9	hsa-miR-218-5p	5.61	6.64	0.020535	0.010044	2.04	A	0.025011	2.04	2.04	33
C10	hsa-miR-16-5p	-2.1	-1.07	4.28178	2.10197	2.04		0.175318	2.04	2.04	33
C11	hsa-miR-200c-3p	-1.58	-0.57	2.99359	1.48391	2.02		0.000711	2.02	2.02	35
C12	hsa-miR-152-3p	3.81	2.8	0.071078	0.143827	0.49		0.007923	-2.02	2.02	35
D1	hsa-miR-296-5p	9.04	8.03	0.001894	0.003831	0.49		0.036238	-2.02	2.02	35
D2	hsa-miR-149-3p	2.45	3.45	0.182953	0.091383	2		0.108824	2	2	38
D3	hsa-miR-1321	10.73	9.76	0.000589	0.001153	0.51		0.044269	-1.96	1.96	39
D4	hsa-miR-424-5p	0.86	-0.07	0.551925	1.05196	0.52		0.389827	-1.91	1.91	40
D5	hsa-miR-370-3p	4.32	5.23	0.050236	0.026591	1.89	A	0.289053	1.89	1.89	41
D6	hsa-miR-4705	10.27	9.36	0.00081	0.001517	0.53		0.027074	-1.87	1.87	42
D7	hsa-miR-203a-3p	1.48	2.34	0.357796	0.197429	1.81		0.954004	1.81	1.81	43
D8	hsa-miR-196a-5p	4.93	5.79	0.032892	0.018129	1.81	A	0.022093	1.81	1.81	43
D9	hsa-miR-135a-5p	4.62	5.46	0.04072	0.022641	1.8	A	0.023587	1.8	1.8	45
D10	hsa-miR-203a-3p	1.51	2.36	0.350433	0.194576	1.8		0.928600	1.8	1.8	45
D11	hsa-miR-410-3p	9.6	8.79	0.001289	0.002266	0.57	B	0.919635	-1.76	1.76	47
D12	hsa-miR-124-3p	8.42	7.6	0.002917	0.005137	0.57	B	0.315925	-1.76	1.76	47
E1	hsa-miR-188-5p	4.92	5.72	0.03306	0.018925	1.75	A	0.027489	1.75	1.75	49
E2	hsa-miR-1207-3p	10.43	9.62	0.000726	0.001272	0.57	B	0.126421	-1.75	1.75	49
E3	hsa-miR-377-3p	9.26	8.48	0.001627	0.002796	0.58	B	0.538554	-1.72	1.72	51
E4	hsa-miR-155-5p	4.59	5.38	0.04146	0.024087	1.72	A	0.025187	1.72	1.72	51
E5	hsa-miR-185-3p	10.31	9.55	0.000789	0.001335	0.59	B	0.120727	-1.69	1.69	53
E6	hsa-miR-1228-3p	6.4	7.16	0.011816	0.007006	1.69	B	0.448057	1.69	1.69	53
E7	hsa-miR-362-3p	6.32	7.06	0.012475	0.007509	1.66		0.017474	1.66	1.66	55
E8	hsa-miR-149-5p	8.44	7.73	0.002876	0.004705	0.61		0.031780	-1.64	1.64	56
E9	hsa-miR-107	7.28	7.98	0.006414	0.003948	1.62	B	0.103376	1.62	1.62	57
E10	hsa-miR-199a-5p	3.84	3.15	0.069615	0.112506	0.62		0.296232	-1.62	1.62	57
E11	hsa-miR-221-3p	1.79	1.12	0.289615	0.460649	0.63		0.016051	-1.59	1.59	59
E12	hsa-let-7e-5p	1.84	1.17	0.279492	0.445164	0.63		0.457380	-1.59	1.59	59
F1	hsa-let-7c-5p	-0.38	-1.04	1.30454	2.063	0.63		0.112161	-1.58	1.58	61
F2	hsa-miR-124-3p	8.26	7.62	0.003271	0.005097	0.64	B	0.318382	-1.56	1.56	62
F3	hsa-miR-221-5p	8.03	7.46	0.003833	0.00569	0.67	B	0.184508	-1.48	1.48	63
F4	hsa-miR-222-3p	2.13	1.66	0.227753	0.317114	0.72		0.080203	-1.39	1.39	64
F5	hsa-miR-126-5p	1.43	0.97	0.370928	0.511713	0.72		0.206230	-1.38	1.38	65
F6	hsa-miR-15b-5p	0.51	0.95	0.7046	0.516464	1.36		0.126952	1.36	1.36	66
F7	hsa-miR-125b-5p	-1.14	-1.48	2.19803	2.79092	0.79		0.030675	-1.27	1.27	67
F8	hsa-miR-7110-3p	9.2	8.86	0.001704	0.002152	0.79	B	0.993856	-1.26	1.26	68
F9	hsa-miR-10a-5p	0.64	0.96	0.64344	0.514915	1.25		0.102713	1.25	1.25	69
F10	hsa-miR-192-5p	3.37	3.65	0.096804	0.079499	1.22		0.531377	1.22	1.22	70
F11	hsa-miR-126-3p	1.8	1.53	0.287681	0.347176	0.83		0.736346	-1.21	1.21	71
F12	hsa-miR-3613-3p	8.52	8.27	0.002722	0.003243	0.84	B	0.996329	-1.19	1.19	72
G1	hsa-miR-4685-5p	8.39	8.17	0.002979	0.003471	0.86	B	0.311545	-1.17	1.17	73
G2	hsa-miR-27a-5p	8.27	8.47	0.003248	0.002818	1.15	B	0.519167	1.15	1.15	74
G3	hsa-miR-32-5p	8.71	8.91	0.002393	0.002073	1.15	B	0.892609	1.15	1.15	74
G4	hsa-miR-193a-3p	8.56	8.74	0.002648	0.002345	1.13	B	0.905573	1.13	1.13	76
G5	hsa-miR-423-5p	0.77	0.92	0.586503	0.528048	1.11		0.286527	1.11	1.11	77
G6	hsa-miR-1-3p	7.66	7.81	0.004957	0.004455	1.11	B	0.110980	1.11	1.11	77
G7	hsa-miR-99b-5p	2.73	2.6	0.151132	0.16449	0.92		0.241477	-1.09	1.09	79
G8	hsa-miR-30c-5p	2.62	2.71	0.162691	0.15238	1.07		0.833067	1.07	1.07	80
G9	hsa-miR-18a-3p	8.33	8.24	0.003102	0.0033	0.94	B	0.880876	-1.06	1.06	81
G10	hsa-miR-128-3p	5.85	5.93	0.017384	0.016437	1.06	B	0.561265	1.06	1.06	81
G11	hsa-miR-3918	8.95	8.9	0.002015	0.002098	0.96	B	0.849600	-1.04	1.04	83
G12	hsa-let-7a-5p	-1.58	-1.57	2.98254	2.97401	1		0.562263	1	1	84
H1	miRTC	2.45	1.17	0.182446	0.445369	0.41		0.023633	-2.44	2.44
H2	PPC	-5.11	-6.26	34.5643	76.6957	0.45		0.036307	-2.22	2.22
H3	miRTC	2.26	0.94	0.208561	0.521019	0.4		0.029047	-2.5	2.5
H4	PPC	-5.01	-6.16	32.2571	71.2626	0.45		0.035446	-2.21	2.21
H5	miRTC	2.22	0.89	0.214524	0.537775	0.4		0.035751	-2.51	2.51
H6	PPC	-5.05	-6.17	33.1716	71.8745	0.46		0.032350	-2.17	2.17
H7	SNORD61	7.99	7.85	0.003925	0.004339	0.9	B	0.487131	-1.11	1.11
H8	SNORD68	7.76	7.07	0.0046	0.007443	0.62	B	0.174475	-1.62	1.62
H9	SNORD61	7.76	7.72	0.004599	0.004741	0.97	B	0.467889	-1.03	1.03
H10	SNORD68	7.62	7.02	0.005086	0.007688	0.66	B	0.130253	-1.51	1.51
H11	cel-miR-39-3p	-0.24	-1.41	1.18417	2.65076	0.45		0.026769	-2.24	2.24
H12	cel-miR-39-3p	-0.2	-1.43	1.14966	2.70334	0.43		0.019824	-2.35	2.35
