# Supplementary material for: Identification of Endometrial Cancer-Specific microRNA Biomarkers in Endometrial Fluid
Source: Int J Mol Sci. 2023 May 12;24(10):8683. doi: 10.3390/ijms24108683 (PMC10218319; doi:10.3390/ijms24108683)
Supplement: Supplementary file 1 [file ijms-24-08683-s001.zip › Table S3_14 EC-Specific miRNA_Their Targets and Pathways.xlsx]

## Sheet: Gene Targets
Table S3 - 14 endometrial cancer-related miRNA biomarkers selected in the phase I study and their targets/signaling pathways
Functional changes in endometrial fluid	miRNA name	Mature sequence accession number	Sequences	PubMed ID		mRNA gene / pathway target	Sample Source	References
Upregulation	miR-183-5p	MIMAT0000261	UAUGGCACUGGUAGAAUUCACU	12624257		Ezrin	EC tissue, EC cells	[26], [46]
	miR-429	MIMAT0001536	UAAUACUGUCUGGUAAAACCGU	15735639		AP-2a, PTEN, EMT	EC tissue, EC cell line	[18], [19], [23], [27]
	miR-146a-5p	MIMAT0000449	UGAGAACUGAAUUCCAUGGGUU	15800047		LIF-STAT3, NOTCH1/2, IRAK1, TRAF6, SMAD4	Endometrium, EC	[23], [47],[48]
	miR-21-5p	MIMAT0000076	UAGCUUAUCAGACUGAUGUUGA	11679670		SRY-box 17, TGF-b	EC tissue, EC cell line, endometrium	[19], [52]
	miR-7-5p	MIMAT0000252	UGGAAGACUAGUGAUUUUGUUGU	12624257		KLF 4	colorectal cancer	[53]
	miR-181a-5p	MIMAT0000256	AACAUUCAACGCUGUCGGUGAGU	12554860		GPRASP1, TBL1X, DPP6, KLF2	EC tissue	[22]
	miR-182-5p	MIMAT0000259	UUUGGCAAUGGUAGAACUCACACU	12624257		PIAS1/Stat3	EC tissue	[54]
	miR-19b-3p	MIMAT0000074	UGUGCAAAUCCAUGCAAAACUGA	17616659	15978578	PTEN	Esophageal cancer	[55]
	miR-34a-5p	MIMAT0000255	UGGCAGUGUCUUAGCUGGUUGU	12624257	17616659	AXIN2, NOTCH1, JAG1, DLL2, VEGFA, L1CAM	cervicovaginal lavarge, EC tissue	[20], [21], [23], [26]
	miR-335-5p	MIMAT0000765	UCAAGAGCAAUAACGAAAAAUGU	14691248	17616659	SOX4, ARGLU1	EC tissue, Uterine Leiomyoma	[20], [56]
Downregulation	miR-204-5p	MIMAT0000265	UUCCCUUUGUCAUCCUAUGCCU	12624257		TrkB-STAT3	EC Cells	[61]
	miR-34b-3p	MIMAT0004676	CAAUCACUAACUCCACUGCCAU	17604727		MET, p53	EC tissue, cell line	[60]
	miR-296-5p	MIMAT0000690	AGGGCCCCCCCUCAAUCCUGU	15183728	15634332	Pin1, NRG1/ERBB2/ERBB3 (EMT)	hepatocellular cancer	[57]
	miR-378c	MIMAT0016847	ACUGGACUUGGAGUCAGAAGAGUGG	19784364		ST7L/Wnt/b-catenin, SDAD1	cervical cancer, colon cancer	[58], [59]
